# Supplementary material for: Anaesthesia in austere environments: literature review and considerations for future space exploration missions
Source: PubMed Central journal article supplement (PMC5824960; doi:10.1038/s41526-018-0039-y), 2018-02-23
Supplement: 41526_2018_39_MOESM2_ESM.pdf [file 41526_2018_39_MOESM2_ESM.pdf]

|    | Reference                                                                                                                                                                                                                                                                                  | LEO* | LMIC*/Humanit. | Combat | ICE* | SEM* | Other |
|----|--------------------------------------------------------------------------------------------------------------------------------------------------------------------------------------------------------------------------------------------------------------------------------------------|------|----------------|--------|------|------|-------|
| 1  | Mars Architecture Steering Group. Mars Design Reference Architecture 5.0. (2009).                                                                                                                                                                                                          |      |                |        |      | ● 1  |       |
| 2  | Doarn, C. R., Williams, R. S., Schneider, V. S. & Polk, J. D. Principles of Crew Health Monitoring and Care. in <i>Space Physiology and Medicine</i> (eds. Nicogossian, A. E. et al.) 393–421 (Springer New York, 2016). doi:10.1007/978-1-4939-6652-3_15                                  | ● 1  |                |        |      |      |       |
| 3  | Nicogossian, A. E. The Environment of Space Exploration. in <i>Space Physiology and Medicine</i> (eds. Nicogossian, A. E. et al.) 59–94 (Springer New York, 2016). doi:10.1007/978-1-4939-6652-3_2                                                                                         | ● 1  |                |        |      | ● 1  |       |
| 4  | Ball, C. G. <i>et al.</i> Prophylactic surgery prior to extended-duration space flight: Is the benefit worth the risk? <i>Can. J. Surg.</i> <b>55</b> , 125–131 (2012).                                                                                                                    |      |                |        |      | ● 1  |       |
| 5  | Bishop, S. L. From Earth Analogues to Space: Learning How to Boldly Go. in <i>On Orbit and Beyond</i> (ed. Vakoch, D. A.) 25–50 (Springer Berlin Heidelberg, 2013). doi:10.1007/978-3-642-30583-2_2                                                                                        | ● 1  |                |        | ● 1  |      |       |
| 6  | Institute of Medicine (U.S.), Committee on Creating a Vision for Space Medicine during Travel Beyond Earth Orbit, National Academy of Science & Board on Health Sciences Policy. <i>Safe passage astronaut care for exploration missions</i> . (John R. Ball, Charles H. Evans Jr., 2001). | ● 1  |                |        |      | ● 1  |       |
| 7  | Descartin, K., Menger, R. & Watkins, S. D. <i>Application of Advances in Telemedicine for Long-Duration Space Flight</i> . (NASA JSC, 2015).                                                                                                                                               | ● 1  |                |        |      | ● 1  |       |
| 8  | Campbell, M. & Dinica, K. Surgical capabilities. in <i>Principles of Clinical Medicine for Space Flight</i> 123–137 (Springer, 2009).                                                                                                                                                      | ● 1  |                |        |      |      |       |
| 9  | Comet, B. <i>et al.</i> MARSTECHCARE, necessary biomedical technologies for crew health control during long-duration interplanetary manned missions. 151 (ESTEC, 2002).                                                                                                                    | ● 1  |                |        |      | ● 1  |       |
| 10 | Drudi, L., Ball, C. G., Kirkpatrick, A. W., Saary, J. & Grenon, S. M. Surgery in Space: Where are we at now? <i>Acta Astronaut.</i> <b>79</b> , 61–66 (2012).                                                                                                                              | ● 1  |                |        |      | ● 1  |       |
| 11 | Kirkpatrick, A. W. <i>et al.</i> Severe traumatic injury during long duration spaceflight: Light years beyond ATLS. <i>J. Trauma Manag. Outcomes</i> <b>3</b> , 4 (2009).                                                                                                                  | ● 1  |                |        |      | ● 1  |       |
| 12 | Konczowski, M., Fleming, S. & Kirkpatrick, A. W. Fundamentals of anesthesiology for spaceflight. <i>J. Cardiothorac. Vasc. Anesth.</i> (2016). doi:10.1052/jvsa.2016.01.007                                                                                                                | ● 1  |                |        |      | ● 1  |       |
| 13 | Kuypers, M. I. Emergency and Wilderness Medicine Training for Physician Astronauts on Exploration Class Missions. <i>Wild Env. Med</i> <b>24</b> , 445–449 (2013).                                                                                                                         |      |                |        |      | ● 1  |       |
| 14 | Agnew, J., Fibuch, E. & Hubbard, J. Anesthesia during and after exposure to microgravity. <i>Aviat. Space Environ. Med.</i> <b>75</b> , 571–80 (2004).                                                                                                                                     | ● 1  |                |        |      | ● 1  |       |



|    |                                                                                                                                                                                                                                                                           |     |     |     |     |     |     |
|----|---------------------------------------------------------------------------------------------------------------------------------------------------------------------------------------------------------------------------------------------------------------------------|-----|-----|-----|-----|-----|-----|
| 29 | McQueen, K. <i>et al.</i> The Bare Minimum: The Reality of Global Anaesthesia and Patient Safety. <i>World J. Surg.</i> <b>39</b> , 2153–2160 (2015).                                                                                                                     |     | ● 1 |     |     |     |     |
| 30 | Merchant, A. <i>et al.</i> Evaluating Progress in the Global Surgical Crisis: Contrasting Access to Emergency and Essential Surgery and Safe Anesthesia Around the World. <i>World J. Surg.</i> <b>39</b> , 2630–2635 (2015).                                             |     | ● 1 |     |     |     |     |
| 31 | WHO. <i>WHO Guidelines for Safe Surgery 2009: Safe Surgery Saves Lives</i> . (World Health Organization, 2009).                                                                                                                                                           |     | ● 1 |     |     |     |     |
| 32 | <i>Essential Surgery: Disease Control Priorities, Third Edition (Volume 1)</i> . (The International Bank for Reconstruction and Development / The World Bank, 2015).                                                                                                      |     | ● 1 |     |     |     |     |
| 33 | Spiegel, D. A., Abdullah, F., Price, R. R., Gosselin, R. A. & Bickler, S. W. World Health Organization Global Initiative for Emergency and Essential Surgical Care: 2011 and beyond. <i>World J. Surg.</i> <b>37</b> , 1462–1469 (2013).                                  |     | ● 1 |     |     |     |     |
| 34 | Buckenmaier, C. C., Lee, E. H., Shields, C. H., Sampson, J. B. & Chiles, J. H. Regional anesthesia in austere environments. <i>Reg. Anesth. Pain Med.</i> <b>28</b> , 321–327 (2003).                                                                                     |     | ● 1 |     | ● 1 |     |     |
| 35 | Keene, D. D. <i>et al.</i> Died of wounds: a mortality review. <i>J. R. Army Med. Corps</i> <b>162</b> , 355–360 (2016).                                                                                                                                                  |     |     | ● 1 |     |     |     |
| 36 | Mahoney, P. F. <i>Combat Anesthesia: The First 24 Hours</i> . (Department of the Army, 2016).                                                                                                                                                                             |     |     | ● 1 |     |     |     |
| 37 | Mahoney, P. F. & McFarland, C. C. Field Anesthesia and Military Injury. in <i>Trauma Anesthesia</i> (Cambridge University Press, 2008).                                                                                                                                   |     |     | ● 1 |     |     |     |
| 38 | Mellor, A. J. Anaesthesia in austere environments. <i>J. R. Army Med. Corps</i> <b>151</b> , 272–276 (2005).                                                                                                                                                              |     |     | ● 1 | ● 1 |     |     |
| 39 | National Association of Emergency Medical Technicians. Tactical Combat Casualty Care Guidelines for Medical Personnel. (2016).                                                                                                                                            |     |     | ● 1 |     |     |     |
| 40 | Imray, C. H. E., Grocott, M. P. W., Wilson, M. H., Hughes, A. & Auerbach, P. S. Extreme, expedition, and wilderness medicine. <i>The Lancet</i> <b>386</b> , 2520–2525 (2015).                                                                                            |     |     |     | ● 1 |     | ● 1 |
| 41 | Aach-Larsen, B. Health care in the circumpolar world. Greenland. <i>Int. J. Circumpolar Health</i> <b>63 Suppl 2</b> , 49–53 (2004).                                                                                                                                      |     |     |     | ● 1 |     |     |
| 42 | Grant, I. C. Telemedicine in the British Antarctic survey. <i>Int. J. Circumpolar Health</i> <b>63</b> , 356–364 (2004).                                                                                                                                                  |     |     |     | ● 1 |     |     |
| 43 | Otto, C. <i>et al.</i> Evaluation of tele-ultrasound as a tool in remote diagnosis and clinical management at the Amundsen-Scott South Pole Station and the McMurdo Research Station. <i>Telemed. J. E-Health Off. J. Am. Telemed. Assoc.</i> <b>19</b> , 186–191 (2012). |     |     |     | ● 1 |     |     |
| 44 | Minard, C. G., de Carvalho, M. F. & Iyengar, M. S. Optimizing medical resources for spaceflight using the integrated medical model. <i>Aviat. Space Environ. Med.</i> <b>82</b> , 890–894 (2011).                                                                         | ● 1 |     |     |     | ● 1 |     |
| 45 | Fisher, A. D., Miles, E. A., Cap, A. P., Strandenes, G. & Kane, S. F. Tactical Damage Control Resuscitation. <i>Mil. Med.</i> <b>180</b> , 869–875 (2015).                                                                                                                |     |     | ● 1 |     |     |     |
| 46 | Grocott, M. & Johannson, L. Ketamine for emergency anaesthesia at very high altitude (4243 m above sea-level). <i>Anaesthesia</i> <b>62</b> , 959–962 (2007).                                                                                                             |     |     |     | ● 1 |     |     |

|    |                                                                                                                                                                                                                                                   |   |   |   |   |   |   |   |   |
|----|---------------------------------------------------------------------------------------------------------------------------------------------------------------------------------------------------------------------------------------------------|---|---|---|---|---|---|---|---|
| 47 | Jochberger, S. <i>et al.</i> Anesthesia and its allied disciplines in the developing world: a nationwide survey of the Republic of Zambia. <i>Anesth. Analg.</i> <b>106</b> , 942–948, table of contents (2008).                                  |   | ● | 1 |   |   |   |   |   |
| 48 | Wong, L. G. <i>et al.</i> Operative trauma in low-resource settings. The experience of Médecins Sans Frontières in environments of conflict, postconflict, and disaster. <i>Surgery</i> <b>157</b> , 850–856 (2015).                              |   | ● | 1 |   |   |   |   |   |
| 49 | Strube, P. D. & Perkins, A. D. Combat Anesthesia: A Case Report of a Gunshot Wound and New Trauma Protocols. <i>AANA J.</i> <b>83</b> , 247–253 (2015).                                                                                           |   |   |   | ● | 1 |   |   |   |
| 50 | WHO. Essential surgical care aide-memoire: surgical and emergency obstetrical care at first referral level. (2003).                                                                                                                               |   | ● | 1 |   |   |   |   |   |
| 51 | WHO. <i>Surgical Care at the District Hospital</i> . (World Health Organization, 2003).                                                                                                                                                           |   | ● | 1 |   |   |   |   |   |
| 52 | Clément, G. Psychological Issues of Spaceflight. in <i>Fundamentals of Space Medicine</i> 217–255 (Springer New York, 2011). doi:10.1007/978-1-4419-9905-4_6                                                                                      | ● | 1 |   |   |   | ● | 1 |   |
| 53 | Shayler, D. <i>Disasters and Accidents in Manned Spaceflight</i> . (Springer, 2000).                                                                                                                                                              | ● | 1 |   |   |   |   |   |   |
| 54 | Crucian, B. <i>et al.</i> Immune System Dysregulation Occurs During Short Duration Spaceflight On Board the Space Shuttle. <i>J. Clin. Immunol.</i> <b>33</b> , 456–465 (2013).                                                                   | ● | 1 |   |   |   |   |   |   |
| 55 | Mermel, L. A. Infection Prevention and Control During Prolonged Human Space Travel. <i>Clin. Infect. Dis.</i> <b>56</b> , 123–130 (2013).                                                                                                         | ● | 1 |   |   |   | ● | 1 |   |
| 56 | Smith, S. M. <i>et al.</i> Bone metabolism and renal stone risk during international space station missions. <i>Bone</i> (2015). doi:10.1016/j.bone.2015.10.002                                                                                   | ● | 1 |   |   |   | ● | 1 |   |
| 57 | Komorowski, M., Fleming, S. & Hinkelbein, J. Anaesthesia in outer space: the ultimate ambulatory setting? <i>Curr. Opin. Anaesthesiol.</i> <b>29</b> , 649–654 (2016).                                                                            | ● | 1 |   |   |   | ● | 1 |   |
| 58 | Merry, A. F., Cooper, J. B., Soyannwo, O., Wilson, I. H. & Eichhorn, J. H. International Standards for a Safe Practice of Anesthesia 2010. <i>Can. J. Anaesth.</i> <b>57</b> , 1027–1034 (2010).                                                  |   | ● | 1 |   |   |   | ● | 1 |
| 59 | Pignaton, W. <i>et al.</i> Perioperative and Anesthesia-Related Mortality. <i>Medicine (Baltimore)</i> <b>95</b> , (2016).                                                                                                                        |   |   |   |   |   |   | ● | 1 |
| 60 | Dobson, M. B. <i>Anaesthesia at the District Hospital</i> . (World Health Organization, 2001).                                                                                                                                                    |   | ● | 1 |   |   |   |   |   |
| 61 | Neuen, B. L. Access to Safe Anesthesia: A Global Perspective. <i>J. Glob. Health</i> (2014).                                                                                                                                                      |   | ● | 1 |   |   |   |   |   |
| 62 | Schnittger, T. Regional anaesthesia in developing countries. <i>Anaesthesia</i> <b>62</b> , 44–47 (2007).                                                                                                                                         |   | ● | 1 |   |   |   |   |   |
| 63 | Wilhelm, T. J. <i>et al.</i> Anaesthesia for elective inguinal hernia repair in rural Ghana - appeal for local anaesthesia in resource-poor countries. <i>Trop. Doct.</i> <b>36</b> , 147–149 (2006).                                             |   | ● | 1 |   |   |   |   |   |
| 64 | Ouro-Bang'na Maman, A. F., Agbétra, N., Egbohoy, P., Sama, H. & Chobli, M. Morbidité–mortalité périopératoire dans un pays en développement : expérience du CHU de Lomé (Togo). <i>Ann. Fr. Anesth. Réanimation</i> <b>27</b> , 1030–1033 (2008). |   | ● | 1 |   |   |   |   |   |
| 65 | Eliassen, H. S. <i>et al.</i> Making whole blood available in austere medical environments: donor performance and safety. <i>Transfusion (Paris)</i> <b>56</b> , S166–S172 (2016).                                                                |   | ● | 1 | ● | 1 |   |   |   |

|    |                                                                                                                                                                                                                                                                                                |     |     |     |  |     |     |
|----|------------------------------------------------------------------------------------------------------------------------------------------------------------------------------------------------------------------------------------------------------------------------------------------------|-----|-----|-----|--|-----|-----|
| 66 | Ray, J. M. The Treatment of Maxillofacial Trauma in Austere Conditions. <i>Atlas Oral Maxillofac. Surg. Clin. North Am.</i> <b>21</b> , 9–14 (2013).                                                                                                                                           |     | ● 1 |     |  |     |     |
| 67 | Convertino, V. A. & Cooke, W. H. Evaluation of Cardiovascular Risks of Spaceflight Does Not Support the NASA Bioastronautics Critical Path Roadmap. <i>Aviat. Space Environ. Med.</i> <b>76</b> , 869–876 (2005).                                                                              | ● 1 |     |     |  | ● 1 |     |
| 68 | Epelman, S. & Hamilton, D. R. Medical Mitigation Strategies for Acute Radiation Exposure During Spaceflight. <i>Aviat. Space Environ. Med.</i> <b>77</b> , 130–139 (2006).                                                                                                                     | ● 1 |     |     |  | ● 1 |     |
| 69 | Gillis, D. B. & Hamilton, D. R. Estimating outcomes of astronauts with myocardial infarction in exploration class space missions. <i>Aviat. Space Environ. Med.</i> <b>83</b> , 79–91 (2012).                                                                                                  |     |     |     |  | ● 1 |     |
| 70 | Hamilton, D. R. Cardiovascular Disorders. in <i>Principles of Clinical Medicine for Space Flight</i> (eds. Barratt, M. R. & Pool, S. L.) 317–359 (Springer New York, 2008).                                                                                                                    | ● 1 |     |     |  | ● 1 |     |
| 71 | Gunga, H.-C., Ahlefeldt, V. W. von, Coriolano, H.-J. A., Werner, A. & Hoffmann, U. The Cardiovascular System in Space. in <i>Cardiovascular System, Red Blood Cells, and Oxygen Transport in Microgravity</i> 11–34 (Springer International Publishing, 2016). doi:10.1007/978-3-319-33226-0_2 | ● 1 |     |     |  | ● 1 |     |
| 72 | Berwick, D. <i>et al.</i> <i>Creating and Sustaining an Expert Trauma Care Workforce</i> . (National Academies Press (US), 2016).                                                                                                                                                              |     |     | ● 1 |  |     |     |
| 73 | Morey, T. E. & Rice, M. J. Anesthesia in an Austere Setting: Lessons Learned from the Haiti Relief Operation. <i>Anesthesiol. Clin.</i> <b>31</b> , 107–115 (2013).                                                                                                                            |     | ● 1 |     |  |     |     |
| 74 | Trelles, M., Dominguez, L. & Stewart, B. T. Surgery in low-income countries during crisis: experience at Médecins Sans Frontières facilities in 20 countries between 2008 and 2014. <i>Trop. Med. Int. Health</i> <b>20</b> , 968–971 (2015).                                                  |     | ● 1 |     |  |     |     |
| 75 | Dobson, M. B. DRAW-OVER ANAESTHESIA Part 2 - Practical Application. in <i>Update in Anaesthesia</i> (1993).                                                                                                                                                                                    |     | ● 1 |     |  |     |     |
| 76 | Skelton, T. <i>et al.</i> Low-Cost Simulation to Teach Anesthetists' Non-Technical Skills in Rwanda. <i>Anesth. Analg.</i> <b>123</b> , 474–480 (2016).                                                                                                                                        |     | ● 1 |     |  |     |     |
| 77 | McQueen, K. <i>et al.</i> Anesthesia and Perioperative Care. in <i>Essential Surgery: Disease Control Priorities, Third Edition (Volume 1)</i> (eds. Debas, H. T. <i>et al.</i> ) (The International Bank for Reconstruction and Development / The World Bank, 2015).                          |     | ● 1 |     |  |     |     |
| 78 | Galvez, J. A. & Rehman, M. A. Telemedicine in anesthesia: an update. <i>Curr. Opin. Anaesthesiol.</i> <b>24</b> , 459–462 (2011).                                                                                                                                                              |     |     |     |  |     | ● 1 |
| 79 | Murray, A. W., Beaman, S. T., Kampik, C. W. & Quinlan, J. J. Simulation in the operating room. <i>Best Pract. Res. Clin. Anaesthesiol.</i> <b>29</b> , 41–50 (2015).                                                                                                                           |     |     |     |  |     | ● 1 |
| 80 | Ikeyama, T., Shimizu, N. & Ohta, K. Low-Cost and Ready-to-Go Remote-Facilitated Simulation-Based Learning. <i>Simul. Healthc.</i> <b>7</b> , 35 (2012).                                                                                                                                        |     | ● 1 |     |  |     | ● 1 |
| 81 | Livingston, P. <i>et al.</i> Development of a simulation and skills centre in East Africa: a Rwandan-Canadian partnership. <i>Pan Afr. Med. J.</i> <b>17</b> , (2014).                                                                                                                         |     | ● 1 |     |  |     |     |



|    |                                                                                                                                                                                                                                                          |     |     |     |  |     |     |     |
|----|----------------------------------------------------------------------------------------------------------------------------------------------------------------------------------------------------------------------------------------------------------|-----|-----|-----|--|-----|-----|-----|
| 82 | Sallie J. Weaver & Eduardo Salas. Training and Measurement at the Extremes: Developing and Sustaining Expert Team Performance in Isolated, Confined, Extreme Environments. <i>Proc. Hum. Factors Ergon. Soc. Annu. Meet.</i> <b>54</b> , 90–93 (2010).   |     |     |     |  | ● 1 | ● 1 |     |
| 83 | West, P., Gustin, N. & Raimer, B. <i>TELEMEDICINE LINK WITH SOUTH POLE ALLOWS REMOTE KNEE SURGERY</i> . (2002).                                                                                                                                          |     |     |     |  | ● 1 |     |     |
| 84 | Department of Defense. <i>Tactical Combat Casualty Care and Wound Treatment</i> . (Skyhorse Publishing, 2016).                                                                                                                                           |     |     | ● 1 |  |     |     |     |
| 85 | Komorowski, M., Neufhaus, C. & Hinkeldey, P. D. J. Emergency medicine in space. <i>Notf. Rettungsmedizin</i> <b>18</b> , 269–272 (2015).                                                                                                                 | ● 1 |     |     |  |     | ● 1 |     |
| 86 | Saluja, I. S. <i>et al.</i> Survey of astronaut opinions on medical crewmembers for a mission to Mars. <i>Acta Astronaut</i> <b>63</b> , 586–593 (2008).                                                                                                 |     |     |     |  |     | ● 1 |     |
| 87 | Komorowski, M. & Fleming, S. Intubation after rapid sequence induction performed by non-medical personnel during space exploration missions: a simulation pilot study in a Mars analogue environment. <i>Extreme Physiol. Med.</i> <b>4</b> , 19 (2015). |     |     |     |  |     | ● 1 |     |
| 88 | Beam, A. L. & Kohane, I. S. Translating Artificial Intelligence Into Clinical Care. <i>JAMA</i> <b>316</b> , 2368–2369 (2016).                                                                                                                           |     |     |     |  |     |     | ● 1 |
| 89 | Doarn, C. R., Williams, R. S., Nicogossian, A. E. & Polk, J. D. Training in Space Medicine. in <i>Space Physiology and Medicine</i> (eds. Nicogossian, A. E. <i>et al.</i> ) 463–477 (Springer New York, 2016). doi:10.1007/978-1-4939-6652-3_18         | ● 1 |     |     |  |     |     |     |
| 90 | Jha, S. & Topol, E. J. Adapting to Artificial Intelligence: Radiologists and Pathologists as Information Specialists. <i>JAMA</i> <b>316</b> , 2353–2354 (2016).                                                                                         |     |     |     |  |     |     | ● 1 |
| 91 | Jones, P. M. Human Performance in Space. <i>Rev. Hum. Factors Ergon.</i> <b>6</b> , 172–197 (2010).                                                                                                                                                      | ● 1 |     |     |  |     | ● 1 |     |
| 92 | Strangman, G. E., Sipes, W. & Beven, G. Human cognitive performance in spaceflight and analogue environments. <i>Aviat. Space Environ. Med.</i> <b>85</b> , 1033–1048 (2014).                                                                            | ● 1 |     |     |  | ● 1 | ● 1 |     |
| 93 | Walker, I. A. & Wilson, I. H. Anaesthesia in developing countries--a risk for patients. <i>Lancet Lond. Engl.</i> <b>371</b> , 968–969 (2008).                                                                                                           |     | ● 1 |     |  |     |     |     |
| 94 | Jawa, R. S., Zakrison, T. L., Richards, A. T., Young, D. H. & Heir, J. S. Facilitating safer surgery and anesthesia in a disaster zone. <i>Am. J. Surg.</i> <b>204</b> , 406–409 (2012).                                                                 |     | ● 1 |     |  |     |     |     |
| 95 | Vincent, J.-L. The Future of Critical Care Medicine: Integration and Personalization. <i>Crit. Care Med.</i> <b>44</b> , 386–389 (2016).                                                                                                                 |     |     |     |  |     |     | ● 1 |
| 96 | Ventola, C. L. Medical Applications for 3D Printing: Current and Projected Uses. <i>Pharm. Ther.</i> <b>39</b> , 704–711 (2014).                                                                                                                         |     |     |     |  |     | ● 1 | ● 1 |
| 97 | Mehta, P. & Bhayani, D. Impact of space environment on stability of medicines: Challenges and prospects. <i>J. Pharm. Biomed. Anal.</i> <b>136</b> , 111–119 (2017).                                                                                     |     |     |     |  |     | ● 1 |     |
| 98 | Spinella, P. C. Warm fresh whole blood transfusion for severe hemorrhage: U.S. military and potential civilian applications. <i>Crit. Care Med.</i> <b>36</b> , S340-345 (2008).                                                                         |     |     | ● 1 |  |     |     |     |
| 99 | Mahmood, F. <i>et al.</i> Perioperative Ultrasound Training in Anesthesiology: A Call to Action. <i>Anesth. Analg.</i> <b>122</b> , 1794–1804 (2016).                                                                                                    |     |     |     |  |     |     | ● 1 |

|     |                                                                                                                                                                                                                                      |   |   |   |   |   |     |
|-----|--------------------------------------------------------------------------------------------------------------------------------------------------------------------------------------------------------------------------------------|---|---|---|---|---|-----|
| 100 | Talbot, M., Harvey, E. J., Kendri, K., Martineau, P. & Schneider, P. Ultrasound-assisted external fixation: a technique for austere environments. <i>J. R. Army Med. Corps</i> <b>162</b> , 456–459 (2016).                          |   |   | ● | 1 |   |     |
| 101 | Nguyen, B.-V. <i>et al.</i> Determination of the learning curve for ultrasound-guided jugular central venous catheter placement. <i>Intensive Care Med.</i> <b>40</b> , 66–73 (2014).                                                |   |   |   |   |   | ● 1 |
| 102 | Bye, S. M. & Manankov, A. Telemedicine in practice in Arkhangelsk region, Russia: from a blank page to routine operation. <i>Int. J. Circumpolar Health</i> <b>66</b> , 335–350 (2007).                                              |   |   |   |   | ● | 1   |
| 103 | Hemmerling, T. M. <i>et al.</i> Evaluation of a novel closed-loop total intravenous anaesthesia drug delivery system: a randomized controlled trial. <i>Br. J. Anaesth.</i> <b>110</b> , 1031–1039 (2012).                           |   |   |   |   |   | ● 1 |
| 104 | Baker, E. S., Barratt, M. R. & Wear, M. L. Human Response to Spaceflight. in <i>Principles of clinical medicine for space flight</i> (eds. Barratt, M. R. & Pool, S. L.) 27–58 (Springer, 2008).                                     | ● | 1 |   |   |   | ● 1 |
| 105 | Lee, S. M. C., Feiveson, A. H., Stein, S., Stenger, M. B. & Platts, S. H. Orthostatic Intolerance After ISS and Space Shuttle Missions. <i>Aerosp. Med. Hum. Perform.</i> <b>86</b> , A54-67 (2015).                                 | ● | 1 |   |   |   | ● 1 |
| 106 | Hargens, A. R. & Richardson, S. Cardiovascular adaptations, fluid shifts, and countermeasures related to space flight. <i>Respir. Physiol. Neurobiol.</i> <b>169 Suppl 1</b> , S30-33 (2009).                                        | ● | 1 |   |   |   | ● 1 |
| 107 | Norfleet, W. Anesthetic Concerns of Spaceflight. <i>Anesthesiology</i> <b>98</b> , 1219 (2000).                                                                                                                                      | ● | 1 |   |   |   | ● 1 |
| 108 | Modi, P. <i>et al.</i> Accuracy of Inferior Vena Cava Ultrasound for Predicting Dehydration in Children with Acute Diarrhea in Resource-Limited Settings. <i>PLoS ONE</i> <b>11</b> , (2016).                                        |   |   | ● | 1 |   |     |
| 109 | Chisholm, C. B. <i>et al.</i> Focused Cardiac Ultrasound Training: How Much Is Enough? <i>J. Emerg. Med.</i> <b>44</b> , 818–822 (2013).                                                                                             |   |   |   |   |   | ● 1 |
| 110 | Buis, M. L., Maissan, I. M., Hoeks, S. E., Klimek, M. & Stolker, R. J. Defining the learning curve for endotracheal intubation using direct laryngoscopy: A systematic review. <i>Resuscitation</i> <b>99</b> , 63–71 (2016).        |   |   |   |   |   | ● 1 |
| 111 | Lascarrou, J. B. <i>et al.</i> Video Laryngoscopy vs Direct Laryngoscopy on Successful First-Pass Orotracheal Intubation Among ICU Patients: A Randomized Clinical Trial. <i>JAMA</i> <b>317</b> , 483–493 (2017).                   |   |   |   |   |   | ● 1 |
| 112 | Lewis, S. R., Butler, A. R., Parker, J., Cook, T. M. & Smith, A. F. Videolaryngoscopy versus direct laryngoscopy for adult patients requiring tracheal intubation. <i>Cochrane Database Syst. Rev.</i> <b>11</b> , CD011136 (2016).  |   |   |   |   |   | ● 1 |
| 113 | Aguirre Ospina, O. D., Ríos Medina, Á. M., Calderón Marulanda, M. & Gómez Buitrago, L. M. Cumulative Sum learning curves (CUSUM) in basic anaesthesia procedures. <i>Colomb. J. Anesthesiol.</i> <b>42</b> , 142–153 (2014).         |   |   |   |   |   | ● 1 |
| 114 | Nouruzi-Sedeh, P., Schumann, M. & Groeben, H. Laryngoscopy via Macintosh blade versus GlideScope: success rate and time for endotracheal intubation in untrained medical personnel. <i>Anesthesiology</i> <b>110</b> , 32–37 (2009). |   |   |   |   |   | ● 1 |
| 115 | Rudraraju, P. & Eisen, L. A. Confirmation of endotracheal tube position: a narrative review. <i>J. Intensive Care Med.</i> <b>24</b> , 283–292 (2009).                                                                               |   |   |   |   |   | ● 1 |

|     |                                                                                                                                                                                                                                                                                                            |  |  |  |  |  |  |   |   |
|-----|------------------------------------------------------------------------------------------------------------------------------------------------------------------------------------------------------------------------------------------------------------------------------------------------------------|--|--|--|--|--|--|---|---|
| 116 | Komatsu, R. <i>et al.</i> Learning Curves for Bag-and-mask Ventilation and Orotracheal Intubation: An Application of the Cumulative Sum Method. <i>Anesthesiol. J. Am. Soc. Anesthesiol.</i> <b>112</b> , 1525–1531 (2010).                                                                                |  |  |  |  |  |  | ● | 1 |
| 117 | Chesters, A. & Webb, T. Ketamine for procedural sedation by a doctor-paramedic prehospital care team: a 4-year description of practice. <i>Eur. J. Emerg. Med. Off. J. Eur. Soc. Emerg. Med.</i> <b>22</b> , 401–406 (2015).                                                                               |  |  |  |  |  |  | ● | 1 |
| 118 | Bishop, K. A., Litch, J. A. & Stanton, J. M. Ketamine anesthesia at high altitude. <i>High Alt. Med. Biol.</i> <b>1</b> , 111–114 (2000).                                                                                                                                                                  |  |  |  |  |  |  | ● | 1 |
| 119 | Mulvey, J. M., Qadri, A. A. & Maqsood, M. A. Earthquake injuries and the use of ketamine for surgical procedures: the Kashmir experience. <i>Anaesth. Intensive Care</i> <b>34</b> , 489–494 (2006).                                                                                                       |  |  |  |  |  |  | ● | 1 |
| 120 | Russell, K. W. <i>et al.</i> Wilderness Medical Society Practice Guidelines for the Treatment of Acute Pain in Remote Environments. <i>Wilderness Environ. Med.</i> <b>25</b> , 41–49 (2014).                                                                                                              |  |  |  |  |  |  | ● | 1 |
| 121 | Burgess, C. & Dubbs, C. Cosmos/Bion: The age of the biosatellites. in <i>Animals in Space</i> 277–305 (Springer New York, 2007). doi:10.1007/978-0-387-49678-8_10                                                                                                                                          |  |  |  |  |  |  | ● | 1 |
| 122 | Groemer, G. E. <i>et al.</i> The Feasibility of Laryngoscope-Guided Tracheal Intubation in Microgravity During Parabolic Flight: A Comparison of Two Techniques. <i>Anesth. Analg.</i> <b>101</b> , 1533–1535 (2005).                                                                                      |  |  |  |  |  |  | ● | 1 |
| 123 | Keller, C. <i>et al.</i> Airway management during spaceflight: A comparison of four airway devices in simulated microgravity. <i>Anesthesiology</i> <b>92</b> , 1237–1241 (2000).                                                                                                                          |  |  |  |  |  |  | ● | 1 |
| 124 | Rabitsch, W. <i>et al.</i> Airway management with endotracheal tube versus Combitube during parabolic flights. <i>Anesthesiology</i> <b>105</b> , 696–702 (2006).                                                                                                                                          |  |  |  |  |  |  | ● | 1 |
| 125 | Adesunkanmi, A. R. Where there is no anaesthetist: a study of 282 consecutive patients using intravenous, spinal and local infiltration anaesthetic techniques. <i>Trop. Doct.</i> <b>27</b> , 79–82 (1997).                                                                                               |  |  |  |  |  |  | ● | 1 |
| 126 | Aluisio, A. R., Teicher, C., Wiskel, T., Guy, A. & Levine, A. Focused Training for Humanitarian Responders in Regional Anesthesia Techniques for a Planned Randomized Controlled Trial in a Disaster Setting. <i>PLOS Curr. Disasters</i> (2016). doi:10.1371/currents.dis.e75f9f9d977ac8adeddb381e3948a04 |  |  |  |  |  |  | ● | 1 |
| 127 | Newton, M. & Bird, P. Impact of Parallel Anesthesia and Surgical Provider Training in Sub-Saharan Africa: A Model for a Resource-poor Setting. <i>World J. Surg.</i> <b>34</b> , 445–452 (2010).                                                                                                           |  |  |  |  |  |  | ● | 1 |
| 128 | Kessler, J., Wegener, J. T., Hollmann, M. W. & Stevens, M. F. Teaching concepts in ultrasound-guided regional anesthesia. <i>Curr. Opin. Anaesthesiol.</i> <b>29</b> , 608–613 (2016).                                                                                                                     |  |  |  |  |  |  | ● | 1 |
| 129 | Luyet, C. <i>et al.</i> Different Learning Curves for Axillary Brachial Plexus Block: Ultrasound Guidance versus Nerve Stimulation. <i>Anesthesiol. Res. Pract.</i> <b>2010</b> , (2010).                                                                                                                  |  |  |  |  |  |  | ● | 1 |
| 130 | Hunter, J. G. Managing pain on the battlefield: an introduction to continuous peripheral nerve blocks. <i>J. R. Army Med. Corps</i> <b>156</b> , 230–232 (2010).                                                                                                                                           |  |  |  |  |  |  | ● | 1 |
